# Supplementary material for: Effects of symmetry breaking on the translation–rotation eigenstates of H2, HF, and H2O inside the fullerene C60
Source: Royal Society of Chemistry journal article supplement (doi:10.1039/c8fd00082d), 2018-01-01
Supplement: c8fd00082d1.pdf [file c8fd00082d1.pdf]

# Supplementary Information for: Effects of symmetry breaking on the translation-rotation eigenstates of H<sub>2</sub>, HF, and H<sub>2</sub>O inside the fullerene C<sub>60</sub><sup>†</sup>

Zlatko Bačić,<sup>\*,†,‡</sup> Vojtěch Vlček,<sup>¶</sup> Daniel Neuhauser,<sup>¶</sup> and Peter M. Felker<sup>\*,¶</sup>

<sup>†</sup>*Department of Chemistry, New York University, New York, New York 10003, USA*

<sup>‡</sup>*NYU-ECNU Center for Computational Chemistry at NYU Shanghai, 3663 Zhongshan  
Road North, Shanghai 200062, China*

<sup>¶</sup>*Department of Chemistry and Biochemistry, University of California, Los Angeles,  
California 90095-1569, USA*

E-mail: zlatko.bacic@nyu.edu; felker@chem.ucla.edu

## 1 Hamiltonian Parameters

### 1.1 H<sub>2</sub>@C<sub>60</sub>

The kinetic energy operator for H<sub>2</sub>@C<sub>60</sub> was taken to be

$$\hat{T} = -\frac{\nabla^2}{2M} + B\hat{j}^2 \quad (1)$$

where  $\nabla^2$  is the Laplacian associated with  $\mathbf{R}$ ,  $\hat{j}^2$  is the operator corresponding to the square of the rotational angular momentum of the H<sub>2</sub>,  $M$  is the mass of the H<sub>2</sub>, and  $B$  is the

rotational constant of the H<sub>2</sub>. We used  $M = 2.0104$  amu,  $B = 58.378$  cm<sup>-1</sup> for the  $v = 0$  manifold, and  $B = 54.83$  cm<sup>-1</sup> for the  $v = 1$  manifold.

The  $V_{M-C_{60}}$  function for both the  $v = 0$  and the  $v = 1$  manifolds was taken to be a pairwise-additive Lennard-Jones one of the form

$$V_{H_2-C_{60}} = \sum_{i=1}^3 \sum_{k=1}^{60} 4w_i \epsilon \left[ \left( \frac{\sigma}{r_{ik}} \right)^{12} - \left( \frac{\sigma}{r_{ik}} \right)^6 \right], \quad (2)$$

where  $i$  runs over three H<sub>2</sub> sites,  $k$  runs over the 60 nuclear positions of the C atoms in the central cage, and  $r_{ik}$  is the distance between site  $i$  and site  $k$ . For both manifolds the H<sub>2</sub> site 1 was located at the center of the HH bond, and sites 2 and 3 were located at the H nuclei. For  $v = 0$  the HH bond distance was taken to be 0.74 Å,  $w_1 = 6.7$ ,  $w_2 = w_3 = 1$ ,  $\sigma = 2.95$  Å, and  $\epsilon = 3.07$  cm<sup>-1</sup>.<sup>1</sup> For  $v = 1$  the HH bond distance was taken to be 0.78132 Å,  $w_1 = 7.5$ ,  $w_2 = w_3 = 1$ ,  $\sigma = 2.95$  Å, and  $\epsilon = 2.9886668$  cm<sup>-1</sup>.<sup>2</sup> The C<sub>60</sub> geometry was taken to be that used in Felker, et al.<sup>3</sup>

As to  $V_{\text{quad}}$ , the BF  $\hat{z}$  axis was taken to be the internuclear axis, and the one nonzero BF quadrupole component for H<sub>2</sub> was taken to be  $Q_0^{\text{BF}} = 0.499$  au for both the  $v = 0$  and  $v = 1$  manifolds. This is the same value that was used in Felker, et al.<sup>3</sup>

## 1.2 HF@C<sub>60</sub>

The kinetic energy operator for HF@C<sub>60</sub> was taken to have the same form as eqn (1) but with  $M = 20.006225$  amu and  $B = 18.523$  cm<sup>-1</sup>. This value for  $B$  is the cage-modified one determined by Kalugina and Roy.<sup>4</sup>

The  $V_{HF-C_{60}}$  function was taken directly from Kalugina and Roy.<sup>4</sup> It is an expansion over bipolar spherical tensors dependent on the four angles ( $\Theta, \Phi, \omega$ ) with  $R$ -dependent expansion coefficients. It does not require any input as to the C<sub>60</sub> geometry.

The BF  $\hat{z}$  axis was taken by Kalugina and Roy<sup>5</sup> to be the internuclear axis pointing from the H nucleus to the F nucleus. As such  $\vec{\mu} = \mu \hat{z}$  is antiparallel to  $\hat{z}$  and  $\mu$  is negative. We

take the magnitude of  $\mu$  to be the screened value of  $-0.177$  au from Krachmalnicoff, et al.<sup>6</sup>

### 1.3 H<sub>2</sub>O@C<sub>60</sub>

The kinetic energy operator for H<sub>2</sub>O@C<sub>60</sub> was taken to be

$$\hat{T} = -\frac{\nabla^2}{2M} + B_x \hat{j}_x^2 + B_y \hat{j}_y^2 + B_z \hat{j}_z^2 \quad (3)$$

where  $\nabla^2$  is the Laplacian associated with  $\mathbf{R}$ ,  $\hat{j}_x$ ,  $\hat{j}_y$ , and  $\hat{j}_z$  are the operators associated with the components of the rotational angular momentum of the H<sub>2</sub>O along the BF axes, which are take to be its principal inertial axes. We used  $M = 18.0105$  amu,  $B_x = 27.877$  cm<sup>-1</sup>,  $B_y = 9.285$  cm<sup>-1</sup>, and  $B_z = 14.512$  cm<sup>-1</sup>. This choice of the BF axes locates the bisector of the HOH bond angle to be along the BF  $\hat{z}$  axis.

The  $V_{M-C_{60}}$  for H<sub>2</sub>O@C<sub>60</sub> was taken from Felker and Bačić<sup>7</sup> and is given by

$$V_{H_2O-C_{60}} = \sum_{i=1}^3 \sum_{k=1}^{60} 4\epsilon_i \left[ \left( \frac{\sigma_i}{r_{ik}} \right)^{12} - \left( \frac{\sigma_i}{r_{ik}} \right)^6 \right], \quad (4)$$

where  $i$  runs over three H<sub>2</sub>O sites,  $k$  runs over the 60 nuclear positions of the C atoms in the central cage,  $r_{ik}$  is the distance between site  $i$  and site  $k$ ,  $\sigma_1 = 3.372$  Å,  $\sigma_2 = \sigma_3 = 2.640$  Å,  $\epsilon_1 = 36.34$  cm<sup>-1</sup>, and  $\epsilon_2 = \epsilon_3 = 8.95384$  cm<sup>-1</sup>. The three H<sub>2</sub>O sites are given in Table 2 of the ESI of Felker, et al.<sup>3</sup> The C<sub>60</sub> geometry was taken to be the same as that used for H<sub>2</sub>@C<sub>60</sub>.

As to  $V_{\text{quad}}$ , since we take the BF  $\hat{z}$  axis to point from the c.m. of the water moiety toward the O nucleus along the HOH bond-angle bisector, then  $\vec{\mu} = \mu\hat{z}$  is antiparallel to  $\hat{z}$ , and  $\mu$  is negative. We used the screened dipole value,  $\mu = -0.200$  au, from Goh, et al.<sup>8</sup> The BF quadrupole components of the H<sub>2</sub>O were taken to be the same as in Felker, et al.:<sup>3</sup>  $Q_0^{(\text{BF})} = -0.09973$  au and  $Q_{\pm 2}^{(\text{BF})} = 1.53843$  au.

## 2 Grid Parameters

As mentioned in Subsection 2.2 of the main body of the paper the TR state function,  $|\psi\rangle$ , employed in the Chebyshev filter diagonalization procedure was transformed to a grid representation to effect its multiplication by the potential-energy portion of  $\hat{H}$ . The general nature of the five-dimensional (5D) grid points used for  $\text{H}_2@\text{C}_{60}$  and for  $\text{HF}@\text{C}_{60}$ , and the six-dimensional (6D) grid points used for  $\text{H}_2\text{O}@\text{C}_{60}$  are described in Section 2.5 of Felker, et al.<sup>3</sup> Further specifics as to the grids used in this work follow.

For  $\text{M}=\text{H}_2$  we used (i) 12 Gauss-associated-Laguerre quadrature points generated as per Felker and Bačić<sup>9</sup> with  $\beta = 2.9888989$  au for the  $R$  coordinate, (ii) 10 Gauss-Legendre quadrature points for the  $\cos \Theta$  coordinate, (iii) 18 Fourier grid points for the  $\Phi$  coordinate, (iv) 10 Gauss-Legendre quadrature points for the  $\cos \theta$  coordinate, and (v) 18 Fourier grid points for the  $\phi$  coordinate. Here, the relevant Euler angles are  $\omega = (\theta, \phi)$ , where  $\theta$  is the polar angle, and  $\phi$  the azimuthal angle describing the orientation of the BF  $\hat{z}$  axis with respect to the SF axis system.

For  $\text{M}=\text{HF}$  we used (i) 14 Gauss-associated-Laguerre quadrature points generated with  $\beta = 12.0$  au for the  $R$  coordinate, (ii) 12 Gauss-Legendre quadrature points for the  $\cos \Theta$  coordinate, (iii) 24 Fourier grid points for the  $\Phi$  coordinate, (iv) 10 Gauss-Legendre quadrature points for the  $\cos \theta$  coordinate, and (v) 18 Fourier grid points for the  $\phi$  coordinate.

For  $\text{M}=\text{H}_2\text{O}$  we used (i) 12 Gauss-associated-Laguerre quadrature points generated with  $\beta = 24.38$  au for the  $R$  coordinate, (ii) 10 Gauss-Legendre quadrature points for the  $\cos \Theta$  coordinate, (iii) 18 Fourier grid points for the  $\Phi$  coordinate, (iv) 10 Gauss-Legendre quadrature points for the  $\cos \theta$  coordinate, (v) 18 Fourier grid points for the  $\phi$  coordinate, and (vi) 18 Fourier grid points for the  $\chi$  coordinate. Here,  $\omega = (\phi, \theta, \chi)$  are the Euler angles, defined with the convention used in Zare,<sup>10</sup> that specify the orientation of the BF axes of the  $\text{H}_2\text{O}$  with respect to the SF axes.

## References

- (1) M. Xu, S. Ye, A. Powers, R. Lawler, N. J. Turro, and Z. Bačić, *J. Chem. Phys.*, 2013, **139**, 064309.
- (2) M. Xu, F. Sebastianelli, B. R. Gibbons, Z. Bačić, R. Lawler and N. J. Turro, *J. Chem. Phys.*, 2009, **130**, 224306.
- (3) P. M. Felker, V. Vlček, I. Hietanen, S. FitzGerald, D. Neuhauser and Z. Bačić, *Phys. Chem. Chem. Phys.*, 2017, **19**, 31274.
- (4) Y. N. Kalugina and P. N. Roy, *J. Chem. Phys.*, 2017, **147**, 244303.
- (5) P. N. Roy, private communication.
- (6) A. Krachmalnicoff, R. Bounds, S. Mamone, S. Alom, M. Concistrè, B. Meier, K. Kouřil, M. E. Light, M. R. Johnson, S. Rols, A. J. Horsewill, A. Shugai, U. Nagel, T. Rõõm, M. Carravetta, M. Levitt and R. J. Whitby, *Nature Chem.*, 2016, **8**, 953.
- (7) P. M. Felker and Z. Bačić, *J. Chem. Phys.*, 2016, **144**, 201101.
- (8) K. S. K. Goh, M. Jiménez-Ruiz, M. R. Johnson, S. Rols, J. Ollivier, M. S. Denning, S. Mamone, M. H. Levitt, X. Lei, Y. Li, N. J. Turro, Y. Murata and A. J. Horsewill, *Phys. Chem. Chem. Phys.*, 2014, **16**, 21330.
- (9) See P. M. Felker and Z. Bačić, *J. Chem. Phys.*, 2016, **145**, 084310, Supplementary Material, Section II.
- (10) R. N. Zare, *Angular Momentum* (Wiley, New York, 1988).
